# Supplementary material for: Metal–organic frameworks constructed using acid–base mixed ligands, carboxylic acids and N-containing chalcone, and their catalytic performance for Knoevenagel condensation
Source: Royal Society of Chemistry journal article supplement (doi:10.1039/d3nj05164a), 2024-01-01
Supplement: d3nj05164a1.pdf [file d3nj05164a1.pdf]

Electronic Supplementary Information (ESI) for New Journal of Chemistry  
This journal is © The Royal Society of Chemistry 2023

**Electronic Supplementary Information**

**Metal-organic Frameworks constructed with acid-base  
mixed ligands carboxylic acids and N-containing chalcone  
and their catalytic performance for Knoevenagel  
condensation**

Limin Cheng, Junyong Zhang, Caihong Zhan,<sup>\*</sup> Hao Xu, Chunhua Gong,<sup>\*</sup> Jingli Xie<sup>\*</sup>

**Table S1.** Crystal data and structure refinements for MOFs 1–3

| MOFs                                                                                | 1                                                               | 2                                                               | 3                                                               |
|-------------------------------------------------------------------------------------|-----------------------------------------------------------------|-----------------------------------------------------------------|-----------------------------------------------------------------|
| Empirical formula                                                                   | C <sub>45</sub> H <sub>36</sub> CdN <sub>6</sub> O <sub>8</sub> | C <sub>50</sub> H <sub>47</sub> CdN <sub>7</sub> O <sub>9</sub> | C <sub>50</sub> H <sub>47</sub> CoN <sub>7</sub> O <sub>9</sub> |
| Formula weight                                                                      | 901.20                                                          | 1002.34                                                         | 948.87                                                          |
| Temperature (K)                                                                     | 300                                                             | 300.15                                                          | 300.15                                                          |
| Crystal system                                                                      | triclinic                                                       | triclinic                                                       | triclinic                                                       |
| Space group                                                                         | <i>P</i> $\bar{1}$                                              | <i>P</i> $\bar{1}$                                              | <i>P</i> $\bar{1}$                                              |
| a (Å)                                                                               | 8.7214(9)                                                       | 9.6539(4)                                                       | 9.6124(3)                                                       |
| b (Å)                                                                               | 15.1141(14)                                                     | 14.9335(6)                                                      | 14.9026(5)                                                      |
| c (Å)                                                                               | 17.2898(19)                                                     | 17.6393(7)                                                      | 17.2025(6)                                                      |
| $\alpha$ (°)                                                                        | 114.157(10)                                                     | 81.467(3)                                                       | 82.802(3)                                                       |
| $\beta$ (°)                                                                         | 95.733(9)                                                       | 82.719(3)                                                       | 81.793(3)                                                       |
| $\gamma$ (°)                                                                        | 94.009(9)                                                       | 89.187(3)                                                       | 87.487(3)                                                       |
| <i>V</i> (Å <sup>3</sup> )                                                          | 2053.6(4)                                                       | 2494.54(18)                                                     | 2418.92(15)                                                     |
| <i>Z</i>                                                                            | 2                                                               | 2                                                               | 2                                                               |
| <i>D<sub>c</sub></i> (g/cm <sup>3</sup> )                                           | 1.338                                                           | 1.334                                                           | 1.303                                                           |
| $\mu$ (mm <sup>-1</sup> )                                                           | 4.703                                                           | 4.007                                                           | 3.297                                                           |
| <i>F</i> (000)                                                                      | 838                                                             | 1032.0                                                          | 990.0                                                           |
| Radiation                                                                           | Cu- <i>K</i> $\alpha$                                           | Cu- <i>K</i> $\alpha$                                           | Cu- <i>K</i> $\alpha$                                           |
|                                                                                     | ( $\lambda$ = 1.54184)                                          | ( $\lambda$ = 1.54184)                                          | ( $\lambda$ = 1.54184)                                          |
| Reflections collected                                                               | 11681                                                           | 14420                                                           | 36110                                                           |
| Independent reflections                                                             | 7754                                                            | 9410                                                            | 9814                                                            |
| <i>R<sub>int</sub></i>                                                              | 0.0818                                                          | 0.0427                                                          | 0.1540                                                          |
| Data/restraints/parameters                                                          | 7755/269/590                                                    | 9410/589/876                                                    | 9814/467/876                                                    |
| GOF on <i>F</i> <sup>2</sup>                                                        | 0.984                                                           | 1.088                                                           | 0.997                                                           |
| <i>R<sub>I</sub></i> / <i>wR</i> <sub>2</sub> [ <i>I</i> > 2 $\sigma$ ( <i>I</i> )] | 0.0673/0.1514                                                   | 0.0524/0.1412                                                   | 0.0731/0.1725                                                   |
| <i>R<sub>I</sub></i> / <i>wR</i> <sub>2</sub> [all data]                            | 0.1078/0.1830                                                   | 0.0595/0.1485                                                   | 0.1375/0.2154                                                   |

<sup>a</sup>*R*<sub>1</sub> =  $\sum ||F_o| - |F_c|| / \sum |F_o|$ . <sup>b</sup>*wR*<sub>2</sub> =  $(\sum [w(F_o^2 - F_c^2)^2] / \sum [w(F_o^2)^2])^{1/2}$

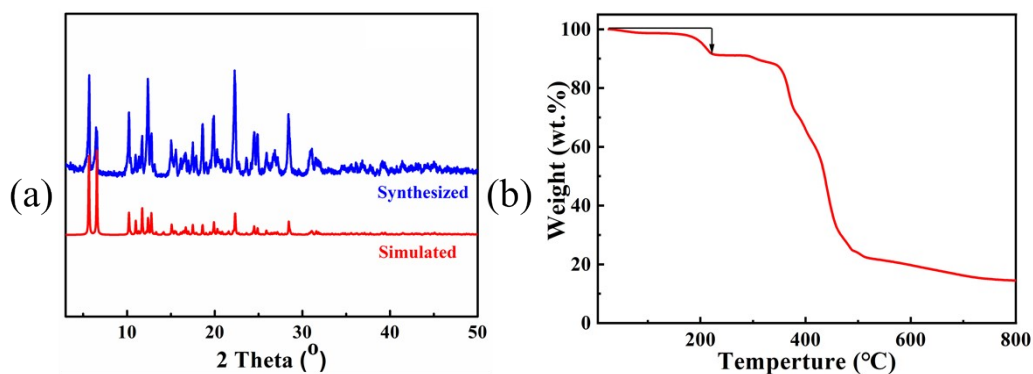

Fig. S1 PXRd pattern and TGA curve of 1.

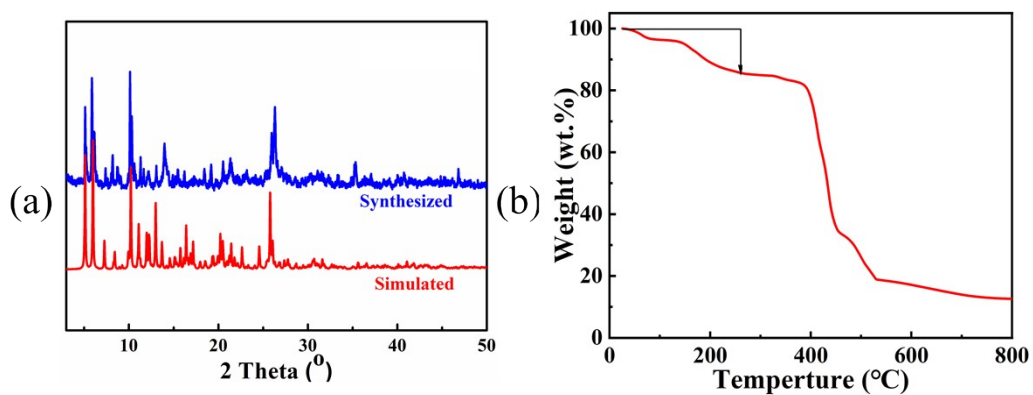

Fig. S2 PXRd pattern and TGA curve of 2.

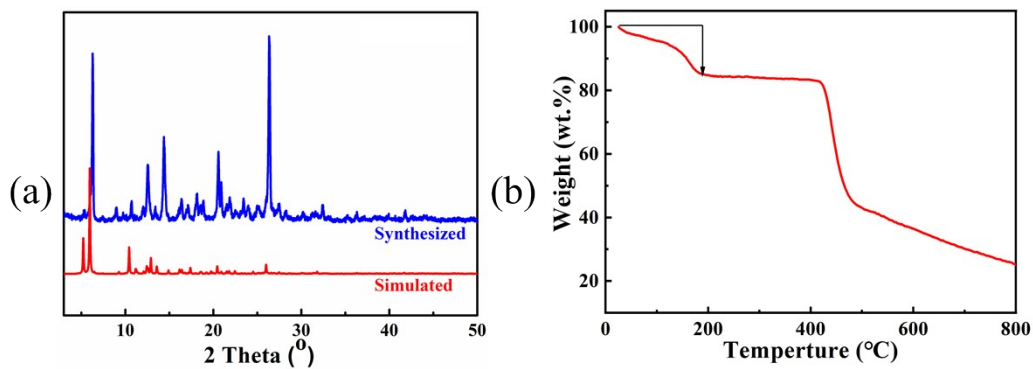

Fig. S3 PXRd pattern and TGA curve of 3.

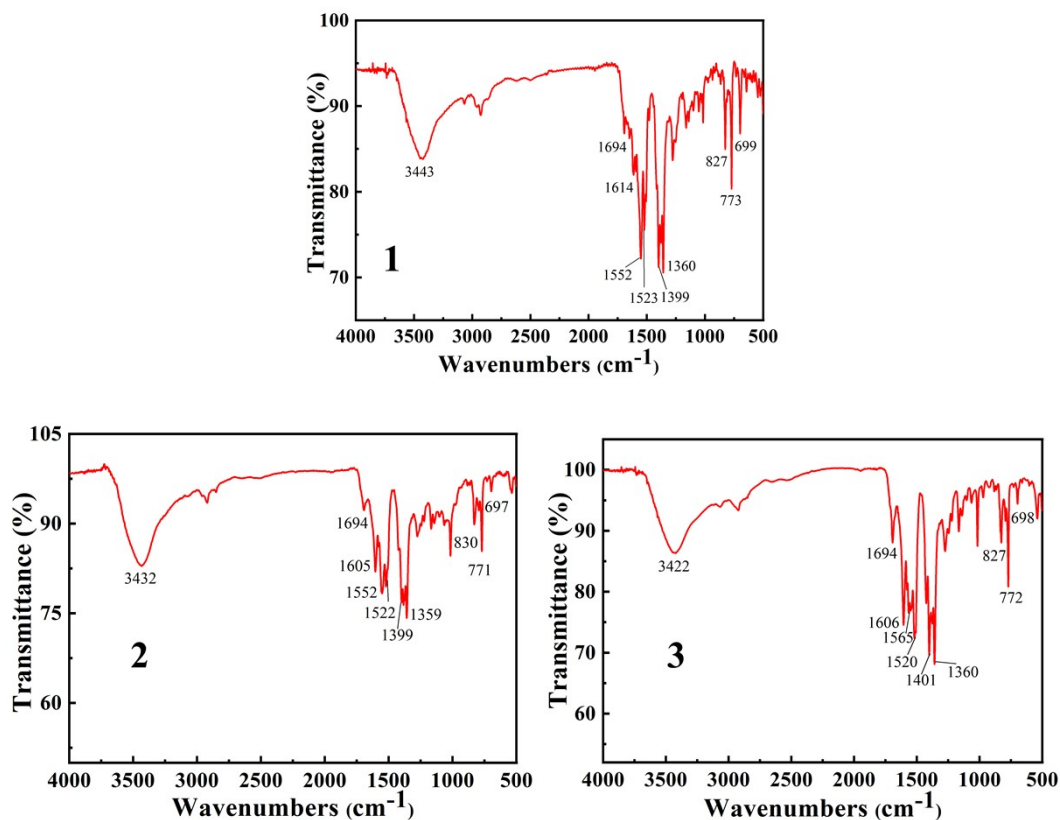

Fig. S4 IR spectra of 1, 2, and 3.

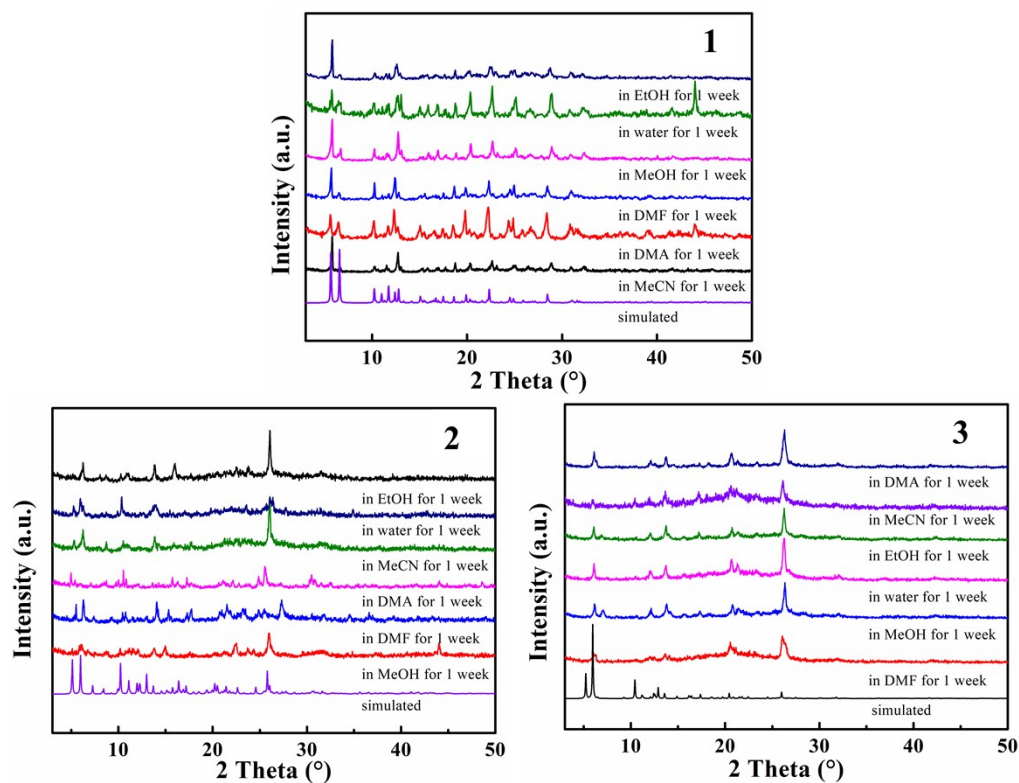

Fig. S5 PXRD patterns of 1, 2, and 3 soaked in different solvents.

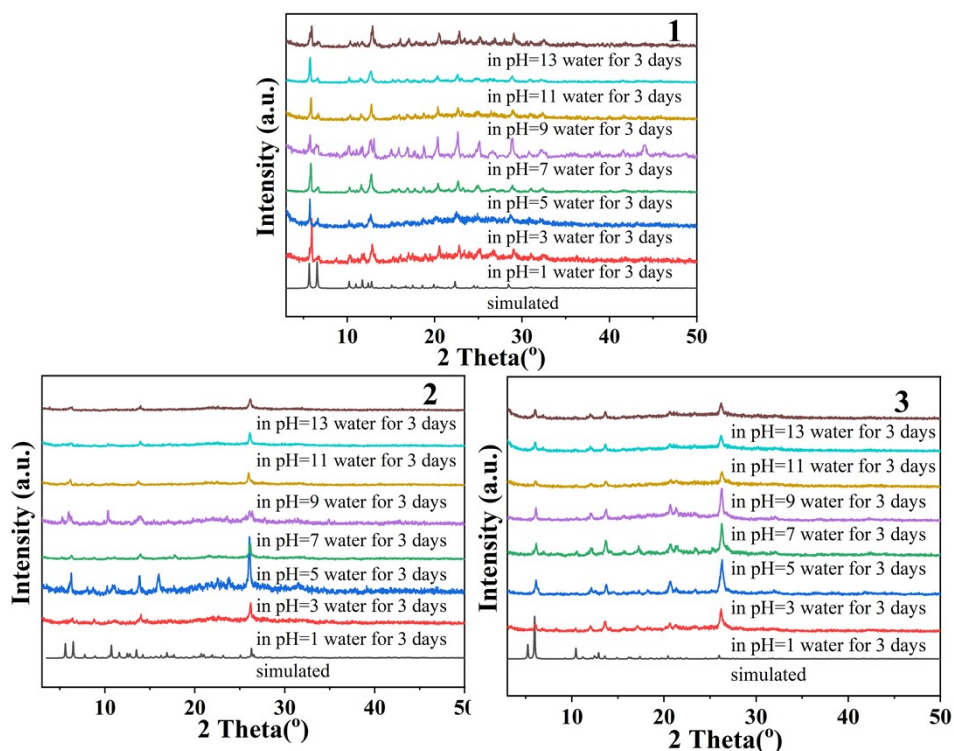

Fig. S6 PXR D patterns for water-, acid- and alkali-treated 1-3.

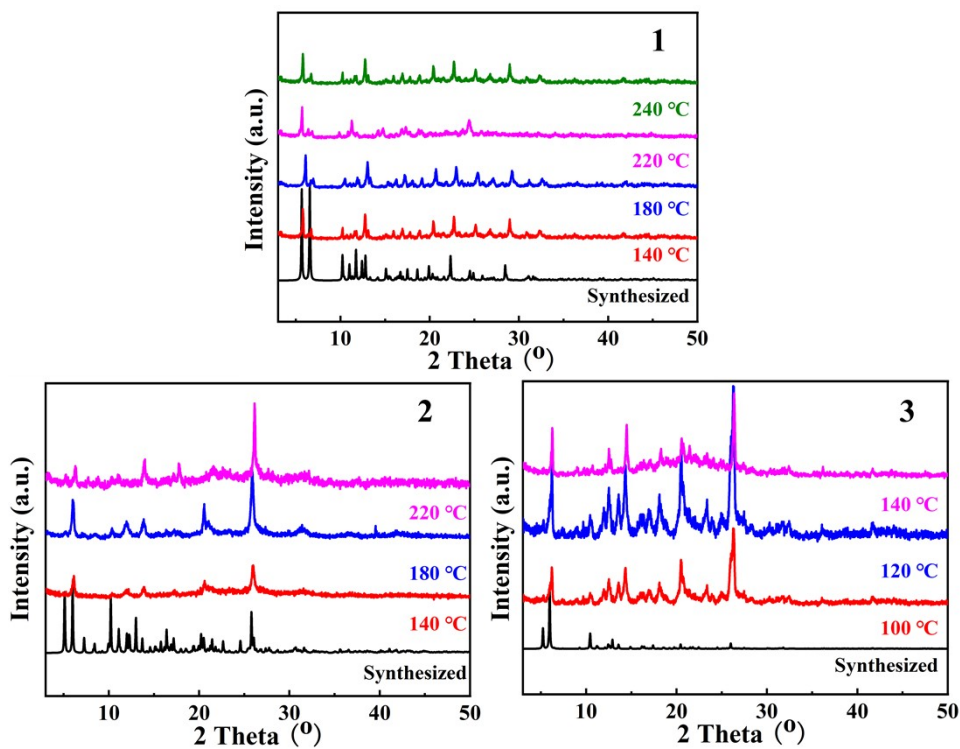

Fig. S7 Variable temperature PXR D patterns of 1-3.

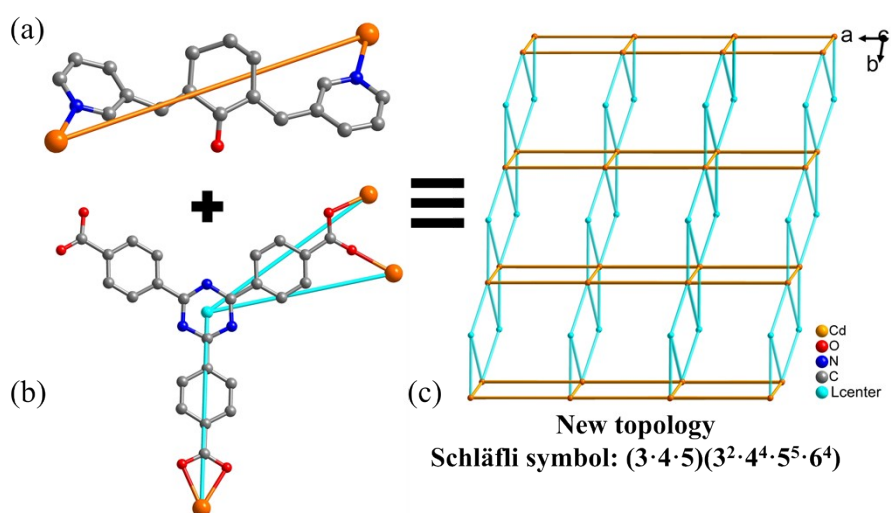

Fig. S8 Topology analysis of 1.

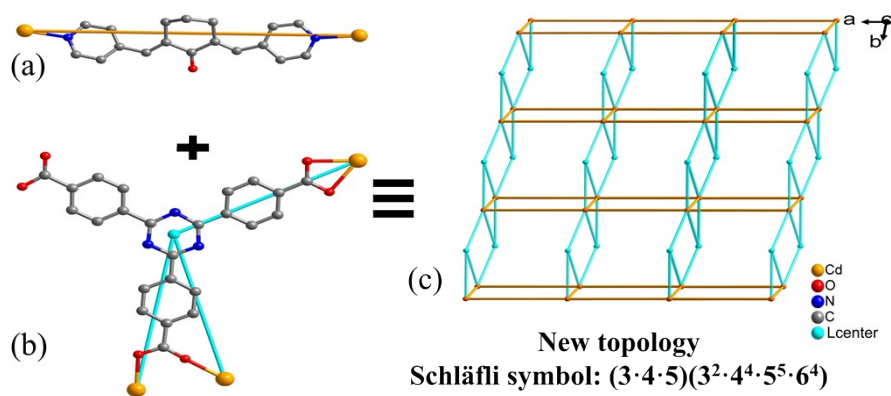

Fig. S9 Topology analysis of 2.

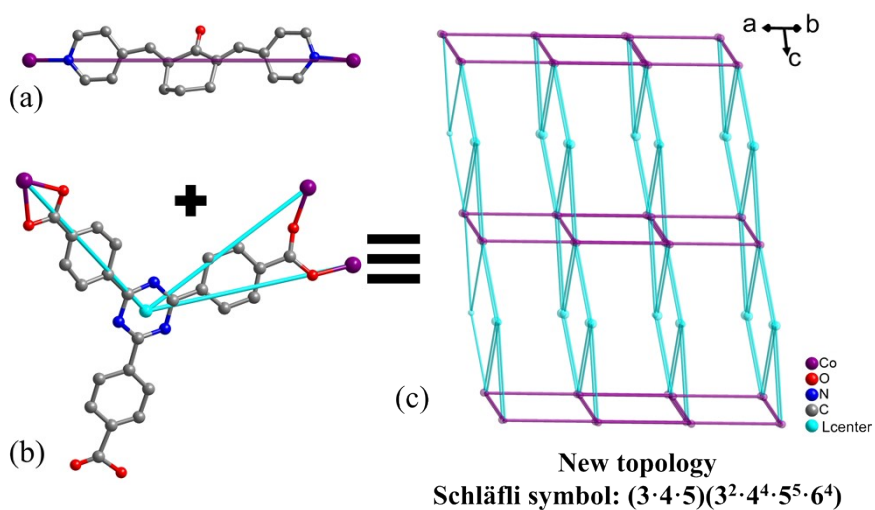

Fig. S10 Topology analysis of 3.

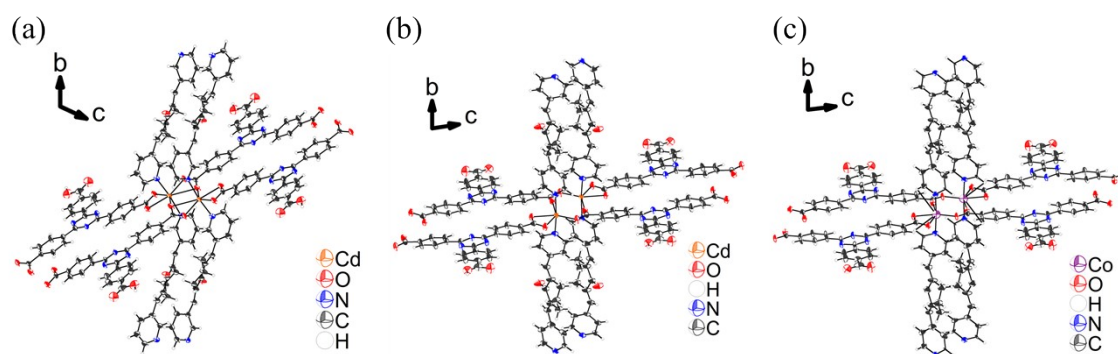

Fig. S11 The ellipsoid diagram of dinuclear metal unit in 1-3.

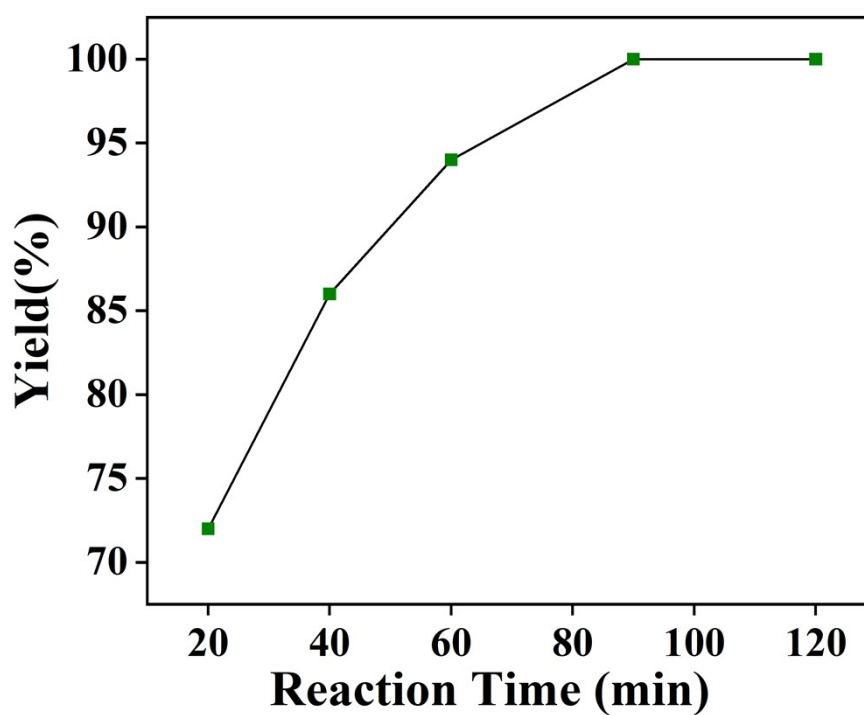

Fig. S12 Kinetics curves of Knoevenagel condensation catalyzed by 1 at 25°C

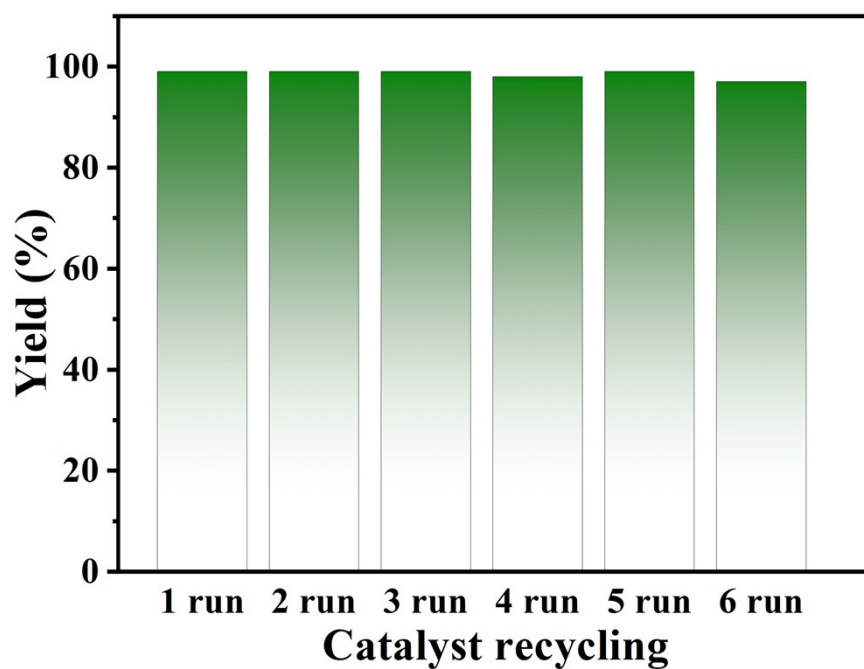

**Fig. S13** Catalyst recycling experiments in the Knoevenagel condensation of benzaldehyde with propanedinitrile catalyzed by **1**.

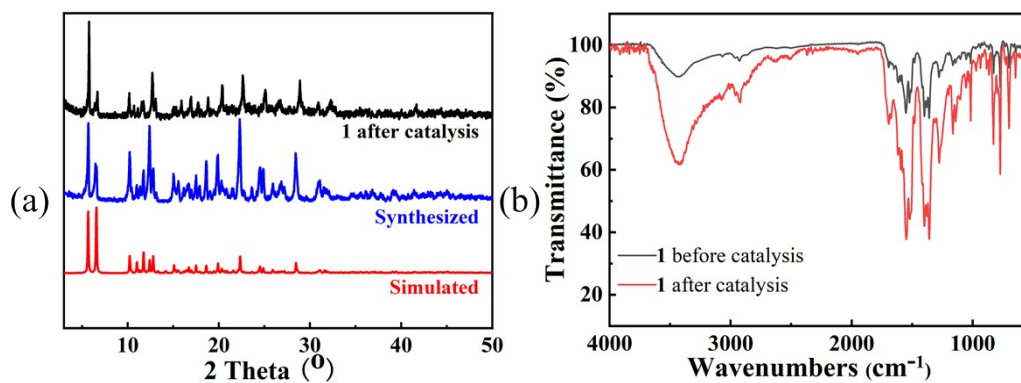

**Fig. S14** (a) PXRD patterns and (b) IR spectra of **1** after catalytic reaction



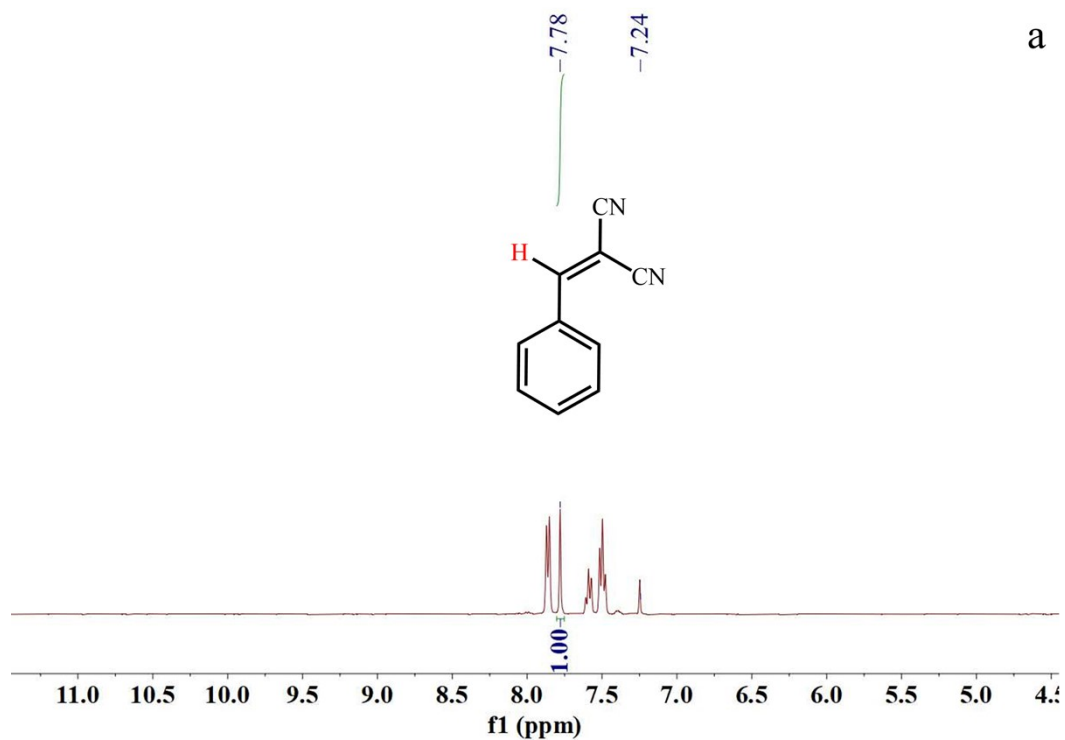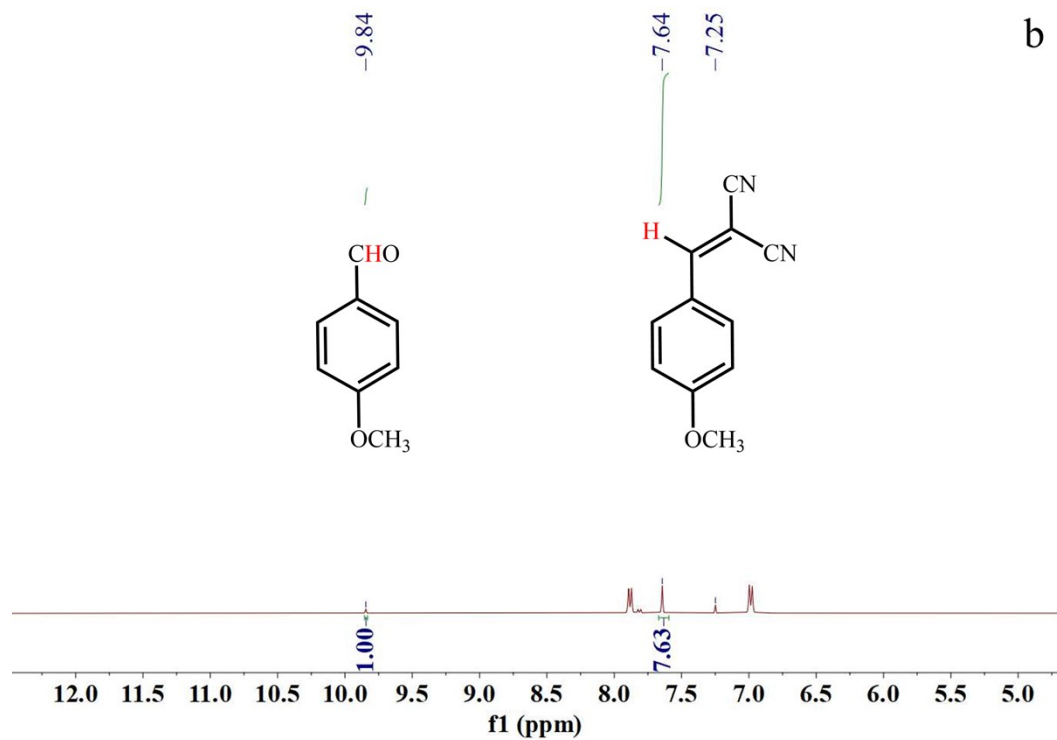

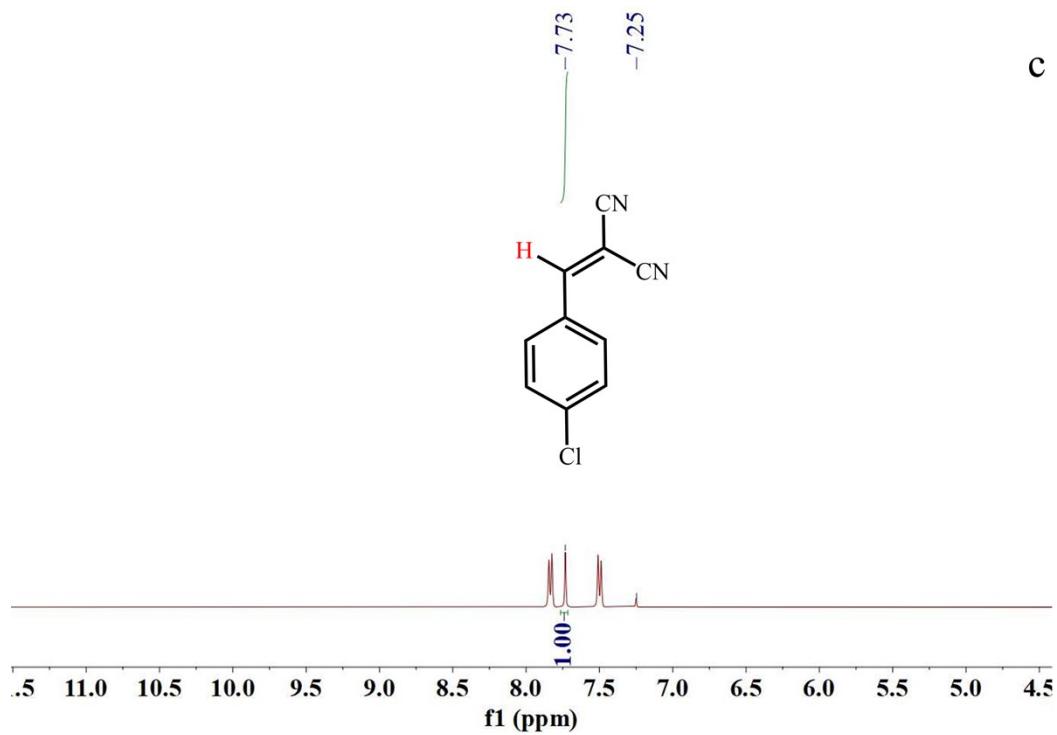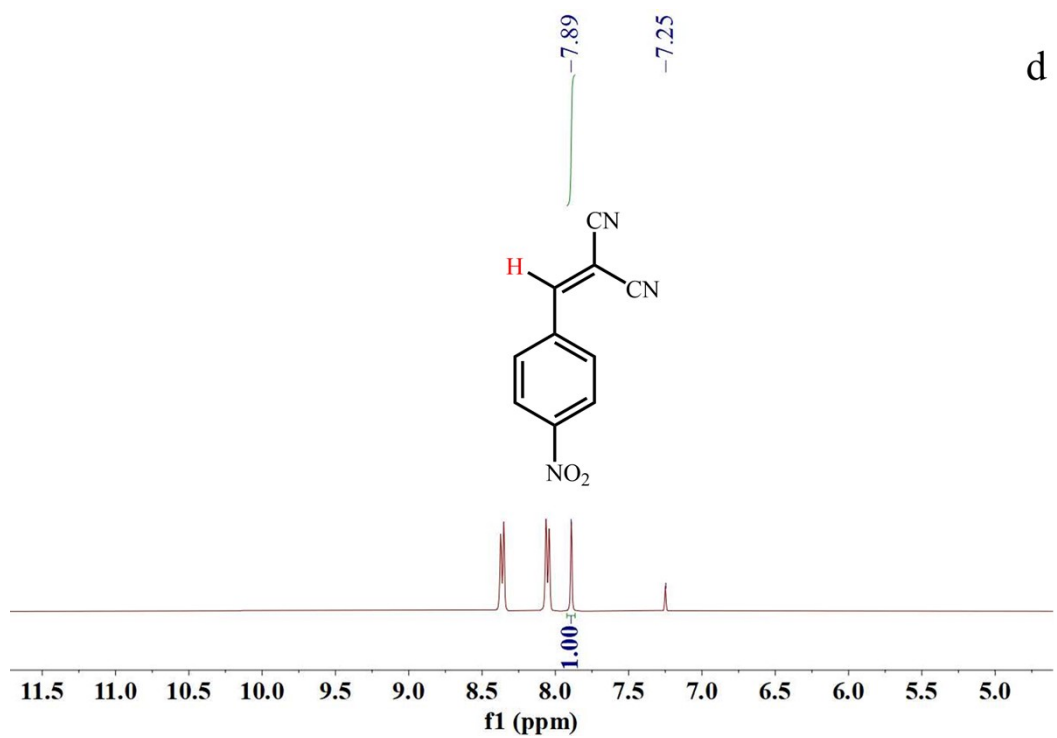

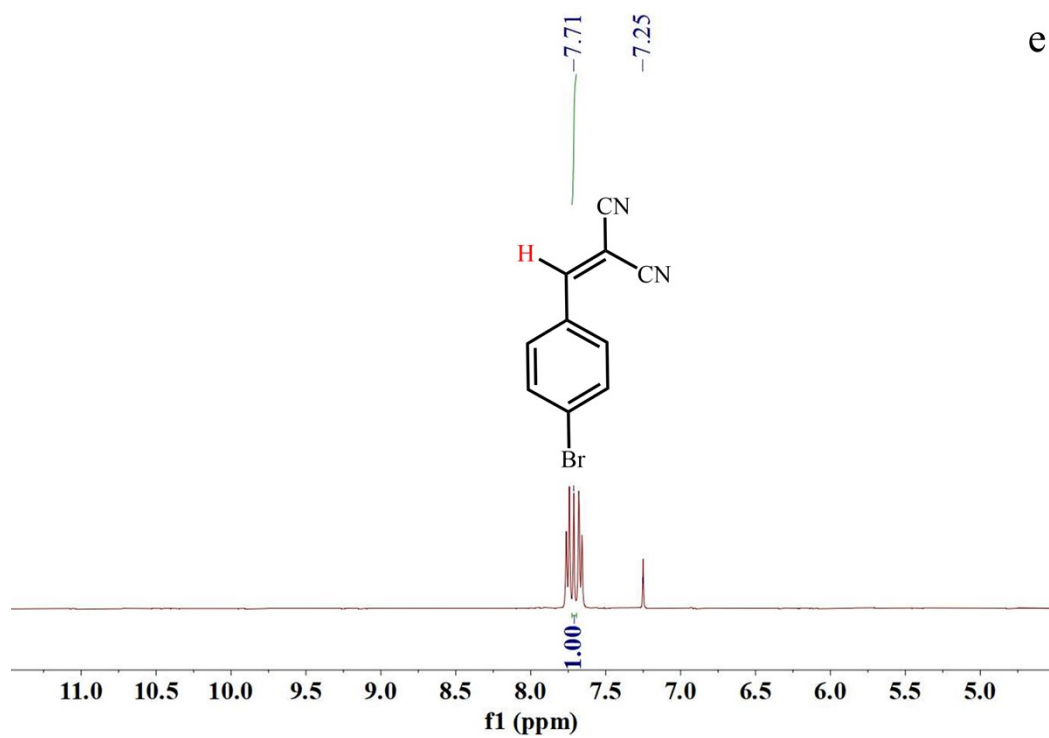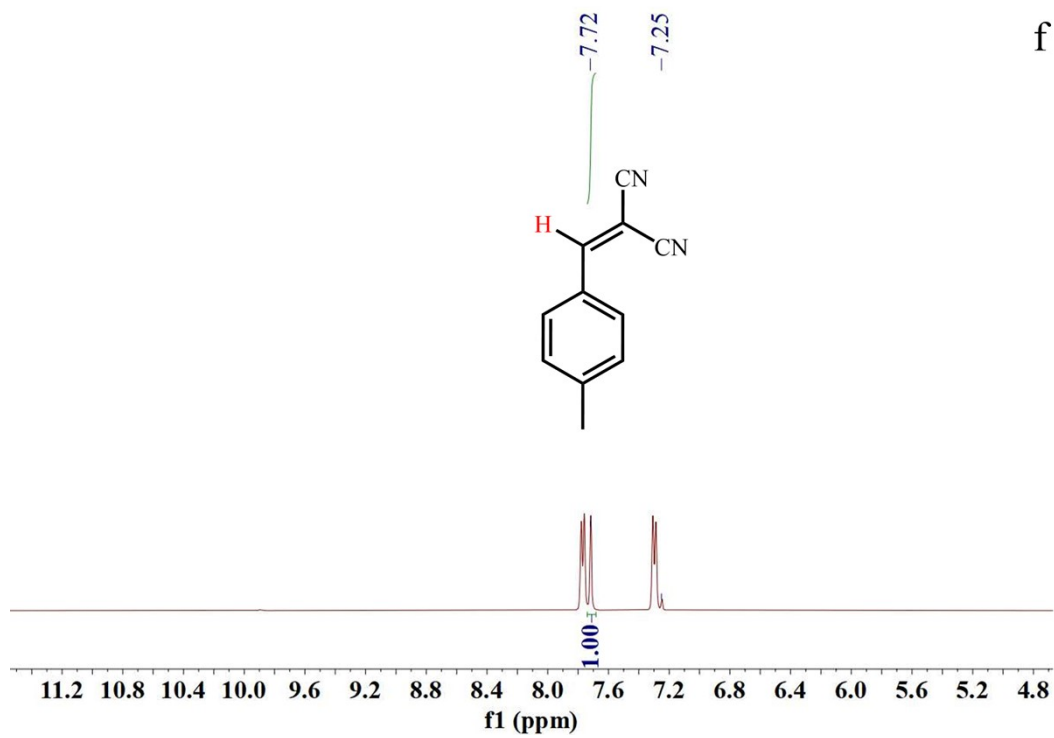

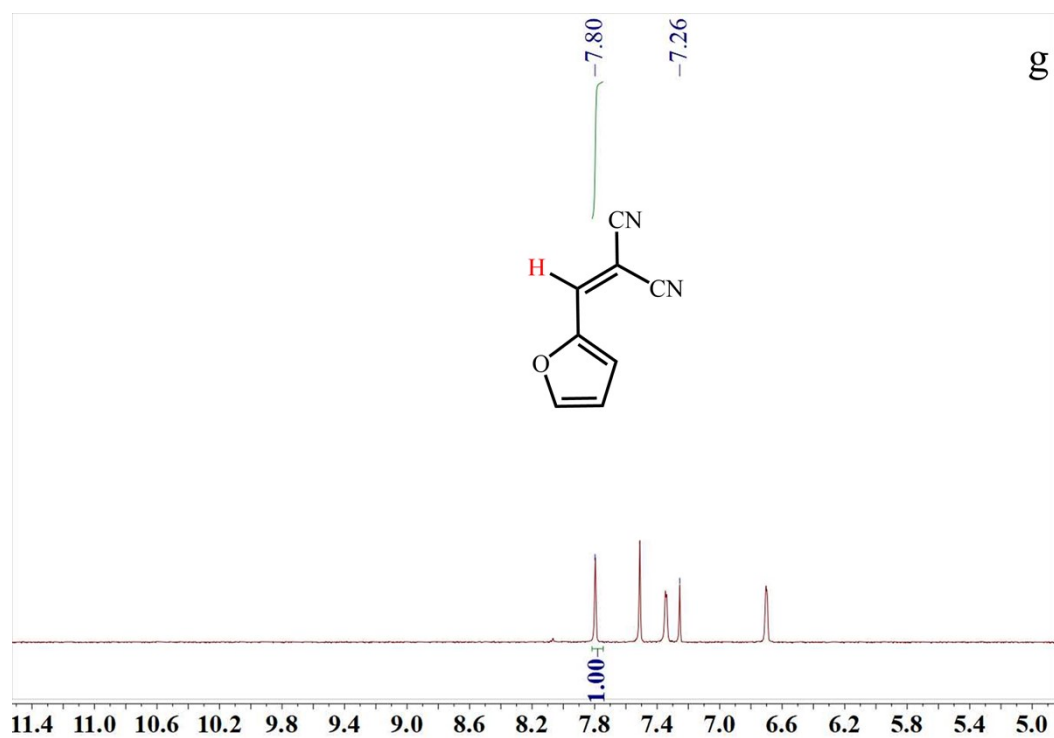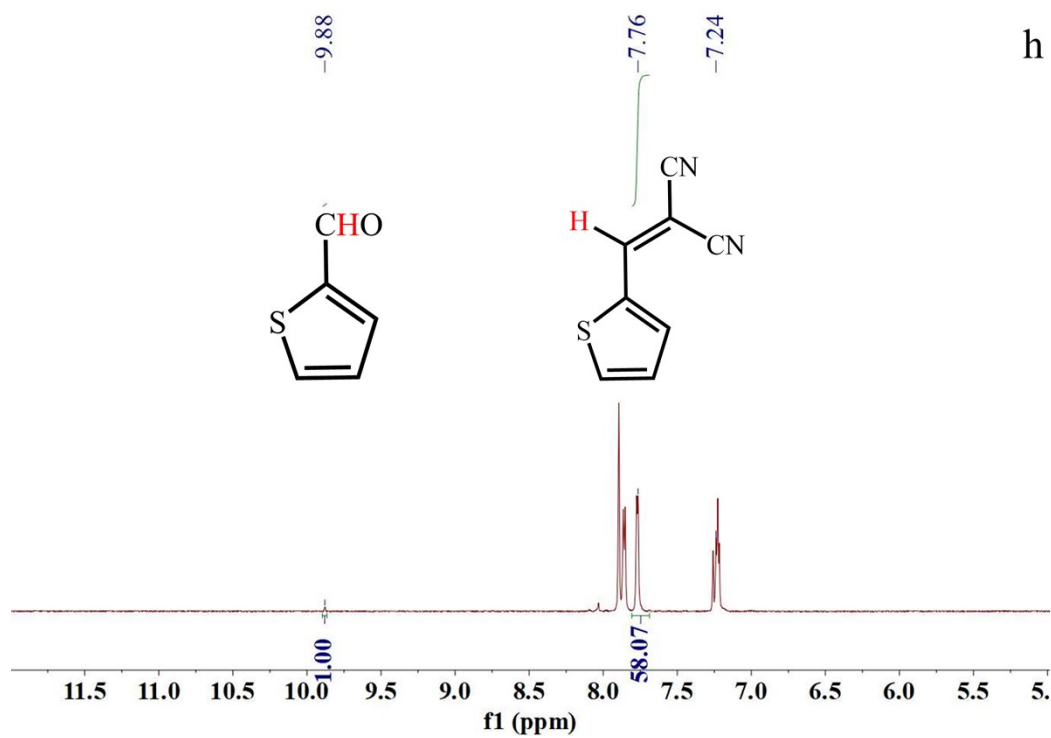

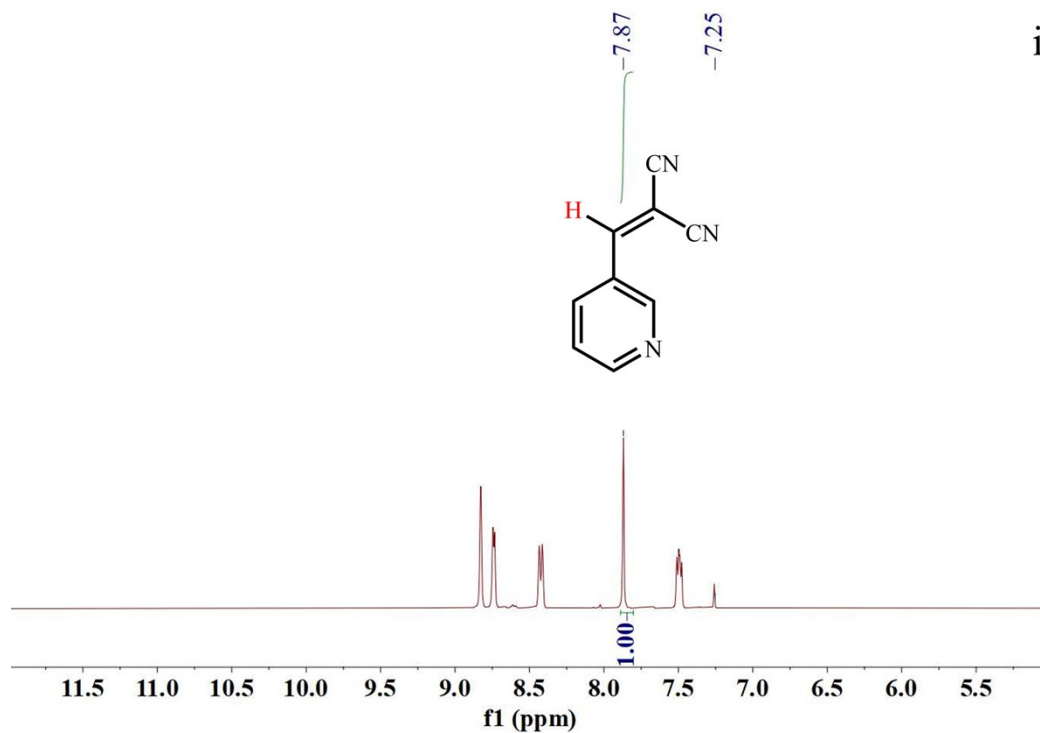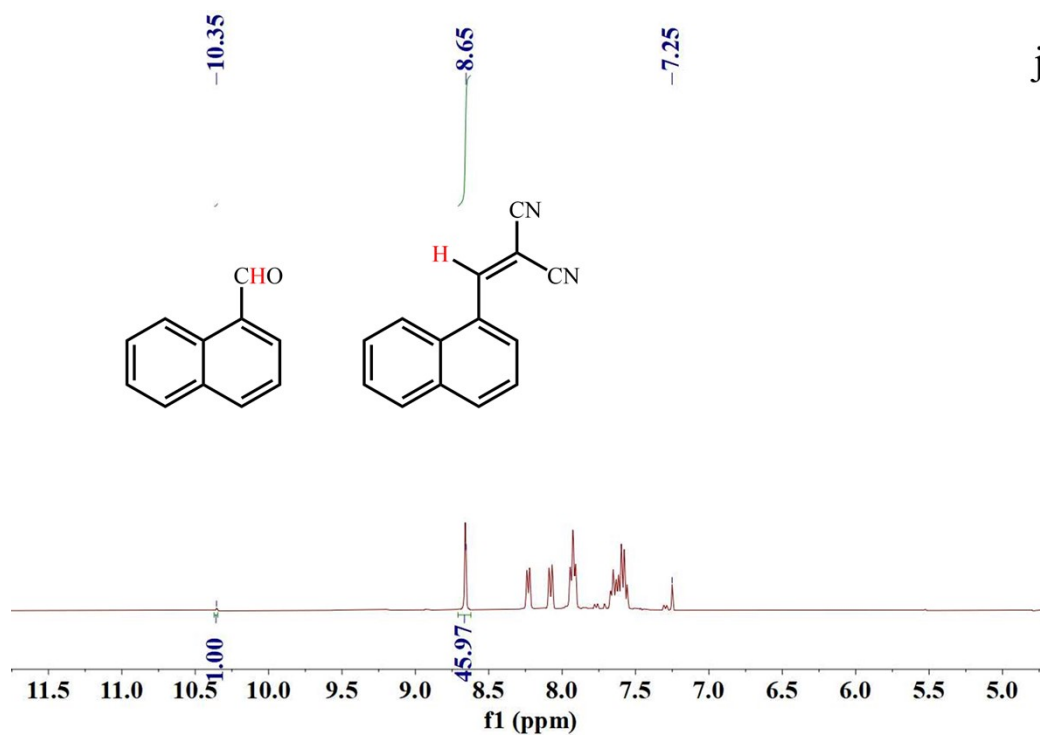

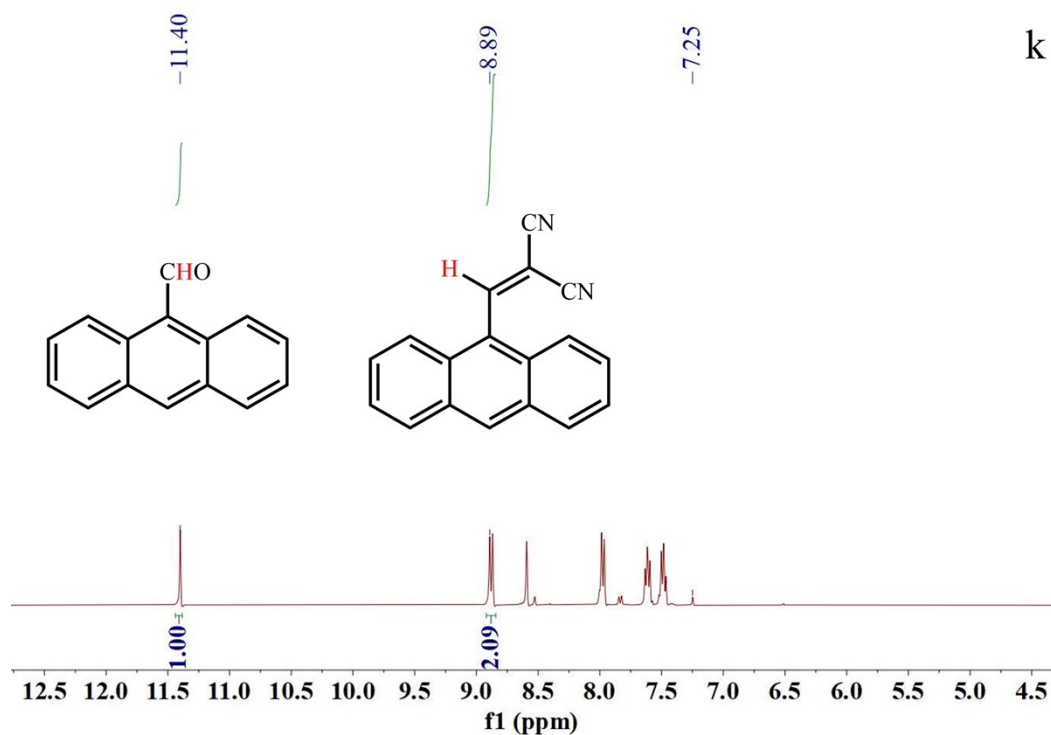

**Fig. S15** Examples for integration of  $^1\text{H}$  NMR spectra for the determination of Knoevenagel condensation products.

**Table S2.** Comparison of the catalytic activity of various MOFs for the Knoevenagel condensation reaction

| MOF                                                                                                     | catalyst (mol%) | solvent                         | temperature (°C) | time (h) | yield (%) | refs      |
|---------------------------------------------------------------------------------------------------------|-----------------|---------------------------------|------------------|----------|-----------|-----------|
| $[\text{Zn}_2(\text{TCA})(\text{BIB})_{2.5}](\text{NO}_3)$                                              | 0.3             | $\text{C}_2\text{H}_5\text{OH}$ | 60               | 1        | 99        | 1         |
| $\{[\text{Cu}_2(\mu_3\text{-pdba})_2(\text{bipy})] \cdot 2\text{H}_2\text{O}\}_n$                       | 2               | $\text{CH}_3\text{OH}$          | RT               | 1        | >99       | 2         |
| $\text{Cd}_2(2\text{-bpbg})(\text{fum})_2(\text{H}_2\text{O})_2$                                        | 1               | -                               | 27               | 3        | 100       | 3         |
| Cd-CDA-MOF                                                                                              | 0.4             | $\text{C}_2\text{H}_5\text{OH}$ | RT               | 12       | 98        | 4         |
| $[\text{Zn}_{15}(\text{mbpz})_6(\text{Hmbpz})_6(\text{L-NO}_2)_4(\text{HL-NO}_2)(\mu_3\text{-OH})_2]_n$ | 0.6             | -                               | 80               | 1        | >99       | 5         |
| NUC-58a                                                                                                 | 0.5             | $\text{C}_2\text{H}_5\text{OH}$ | 65               | 7        | 98        | 6         |
| $[\text{Co}_2(\text{bptc})(\text{H}_2\text{O})_2] \cdot 5\text{DMA}$                                    | 2               | -                               | 60               | 6        | 99        | 7         |
| <b>1</b>                                                                                                | 2               | $\text{CH}_3\text{OH}$          | 25               | 1.5      | 100       | this work |
| <b>2</b>                                                                                                | 2               | $\text{CH}_3\text{OH}$          | 25               | 1.5      | 99        | this work |
| <b>3</b>                                                                                                | 2               | $\text{CH}_3\text{OH}$          | 25               | 1.5      | 96        | this work |

**Table S3.** Selected bond lengths [Å] and angles [°] for MOFs **1–3**.

| 1                                                                                   |            |                                         |            |
|-------------------------------------------------------------------------------------|------------|-----------------------------------------|------------|
| Cd1-O3 <sup>i</sup>                                                                 | 2.335(6)   | Cd1-N2                                  | 2.325(6)   |
| Cd1-O2                                                                              | 2.232(5)   | Cd1-O5 <sup>ii</sup>                    | 2.363(6)   |
| Cd1-O4 <sup>ii</sup>                                                                | 2.414(5)   | Cd1-N1 <sup>iii</sup>                   | 2.331(7)   |
| O3 <sup>i</sup> -Cd1-O4 <sup>ii</sup>                                               | 86.65(18)  | O5 <sup>ii</sup> -Cd1-O4 <sup>ii</sup>  | 55.05(18)  |
| O3 <sup>i</sup> -Cd1-O5 <sup>ii</sup>                                               | 141.70(18) | N1 <sup>iii</sup> -Cd1-O3 <sup>i</sup>  | 83.2(2)    |
| N2-Cd1-N1 <sup>iii</sup>                                                            | 168.1(2)   | N1 <sup>iii</sup> -Cd1-O4 <sup>ii</sup> | 88.4(2)    |
| O2-Cd1-O3 <sup>i</sup>                                                              | 125.3(2)   | N1 <sup>iii</sup> -Cd1-O5 <sup>ii</sup> | 93.7(2)    |
| O2-Cd1-O4 <sup>ii</sup>                                                             | 147.8(2)   | N2-Cd1-O3 <sup>i</sup>                  | 85.9(2)    |
| O2-Cd1-O5 <sup>ii</sup>                                                             | 92.9(2)    | N2-Cd1-O4 <sup>ii</sup>                 | 86.3(2)    |
| O2-Cd1-N1 <sup>iii</sup>                                                            | 91.4(2)    | N2-Cd1-O5 <sup>ii</sup>                 | 92.0(2)    |
| O2-Cd1-N2                                                                           | 98.8(2)    |                                         |            |
| Symmetry codes: (i) $I-x, I-y, 2-z$ ; (ii) $x, I+y, I+z$ ; (iii) $x, -I+y, I+z$ .   |            |                                         |            |
| 2                                                                                   |            |                                         |            |
| Cd1-O1                                                                              | 2.187(3)   | Cd1-O6 <sup>ii</sup>                    | 2.402(3)   |
| Cd1-O2 <sup>i</sup>                                                                 | 2.312(3)   | Cd1-N2 <sup>iii</sup>                   | 2.302(3)   |
| Cd1-O5 <sup>ii</sup>                                                                | 2.375(3)   | Cd1-N1                                  | 2.332(3)   |
| O1-Cd1-O2 <sup>i</sup>                                                              | 121.72(13) | O5 <sup>ii</sup> -Cd1-O6 <sup>ii</sup>  | 55.01(11)  |
| O1-Cd1-O5 <sup>ii</sup>                                                             | 147.87(12) | N2 <sup>iii</sup> -Cd1-O2 <sup>i</sup>  | 85.43(13)  |
| O1-Cd1-O6 <sup>ii</sup>                                                             | 92.91(12)  | N2 <sup>iii</sup> -Cd1-O5 <sup>ii</sup> | 89.41(13)  |
| O1-Cd1-N2 <sup>iii</sup>                                                            | 97.49(14)  | N2 <sup>iii</sup> -Cd1-O6 <sup>ii</sup> | 97.35(14)  |
| O1-Cd1-N1                                                                           | 90.74(15)  | N2 <sup>iii</sup> -Cd1-N1               | 169.13(13) |
| O2 <sup>i</sup> -Cd1-O5 <sup>ii</sup>                                               | 90.00(12)  | N1-Cd1-O5 <sup>ii</sup>                 | 87.33(13)  |
| O2 <sup>i</sup> -Cd1-O6 <sup>ii</sup>                                               | 144.72(12) | N1-Cd1-O6 <sup>ii</sup>                 | 89.27(14)  |
| O2 <sup>i</sup> -Cd1-N1                                                             | 84.21(13)  |                                         |            |
| Symmetry codes: (i) $-I-x, I-y, 2-z$ ; (ii) $+x, +y, I+z$ ; (iii) $-I+x, I+y, +z$ . |            |                                         |            |
| 3                                                                                   |            |                                         |            |
| Co1-O1                                                                              | 1.999(3)   | Co1-O6 <sup>ii</sup>                    | 2.261(3)   |
| Co1-O2 <sup>i</sup>                                                                 | 2.032(3)   | Co1-N2 <sup>iii</sup>                   | 2.160(3)   |
| Co1-O5 <sup>ii</sup>                                                                | 2.122(3)   | Co1-N1                                  | 2.157(3)   |
| O1-Co1-O2 <sup>i</sup>                                                              | 112.87(13) | O2 <sup>i</sup> -Co1-N1                 | 87.26(13)  |
| O1-Co1-O5 <sup>ii</sup>                                                             | 154.64(14) | O5 <sup>ii</sup> -Co1-O6 <sup>ii</sup>  | 59.81(12)  |
| O1-Co1-O6 <sup>ii</sup>                                                             | 94.87(12)  | O5 <sup>ii</sup> -Co1-N2 <sup>iii</sup> | 89.62(12)  |

|                                        |            |                                         |            |
|----------------------------------------|------------|-----------------------------------------|------------|
| O1-Co1-N2 <sup>iii</sup>               | 94.33(13)  | O5 <sup>ii</sup> -Co1-N1                | 87.93(13)  |
| O1-Co1-N1                              | 90.30(13)  | N2 <sup>iii</sup> -Co1-O6 <sup>ii</sup> | 94.97(13)  |
| O2 <sup>i</sup> -Co1-O5 <sup>ii</sup>  | 92.31(13)  | N1-Co1-O6 <sup>ii</sup>                 | 88.71(13)  |
| O2 <sup>i</sup> -Co1-O6 <sup>ii</sup>  | 151.97(12) | N1-Co1-N2 <sup>iii</sup>                | 173.81(14) |
| O2 <sup>i</sup> -Co1-N2 <sup>iii</sup> | 87.16(13)  |                                         |            |

Symmetry codes: (i)  $-I-x, I-y, 2-z$ ; (ii)  $+x, +y, I+z$ ; (iii)  $-I+x, I+y, +z$ .

**Table S4.** The hydrogen-bonding geometry (Å, °) of MOFs 1-3.

| D-H...A                                                                                                                | d(D-H) | d(H...A) | d(D...A) | <D-H...A |
|------------------------------------------------------------------------------------------------------------------------|--------|----------|----------|----------|
| <b>1</b>                                                                                                               |        |          |          |          |
| C41-H41...O1 <sup>i</sup>                                                                                              | 0.931  | 2.645    | 3.329    | 130.78   |
| C16-H16...O5 <sup>ii</sup>                                                                                             | 0.931  | 2.678    | 3.401    | 135.18   |
| C10...H10B...O1 <sup>iii</sup>                                                                                         | 0.971  | 2.691    | 3.351    | 125.69   |
| C5-H5...O2 <sup>iv</sup>                                                                                               | 0.93   | 2.678    | 3.309    | 125.72   |
| C1-H1...O4 <sup>v</sup>                                                                                                | 0.931  | 2.702    | 3.28     | 121.09   |
| Symmetry codes: (i) $x, 2+y, z+I$ ; (ii) $2-x, -y, I-z$ ; (iii) $3-x, 2-y, 2-z$ ; (iv) $x, I+y, z$ ; (v) $x, 2+y, z+I$ |        |          |          |          |
| <b>2</b>                                                                                                               |        |          |          |          |
| C5-H5...O5 <sup>i</sup>                                                                                                | 0.931  | 2.452    | 3.130    | 129.84   |
| C41-H41...O9 <sup>ii</sup>                                                                                             | 0.929  | 2.685    | 3.238    | 129.09   |
| Symmetry codes: (i) $I+x, -I+y, z+I$ ; (ii) $-I-x, -y, 2-z$                                                            |        |          |          |          |
| <b>3</b>                                                                                                               |        |          |          |          |
| C41-H41...O2 <sup>i</sup>                                                                                              | 0.929  | 2.713    | 3.615    | 163.94   |
| C5-H5...O5 <sup>ii</sup>                                                                                               | 0.930  | 2.299    | 2.943    | 125.93   |
| Symmetry codes: (i) $-x, -y, 2-z$ ; (ii) $I+x, -I+y, I+z$                                                              |        |          |          |          |

### References:

1. C. Yao, S. Zhou, X. Kang, Y. Zhao, R. Yan, Y. Zhang and L. Wen, *Inorg. Chem.*, 2018, **57**, 11157-11164.
2. X. Cheng, L. Guo, H. Wang, J. Gu, Y. Yang, M. V. Kirillova and A. M. Kirillov, *Inorg. Chem.*, 2022, **61**, 17951-17962.
3. D. Markad, S. Khullar and S. K. Mandal, *ACS Applied Nano Materials*, 2018, **1**, 5226-5236.
4. A. Goswami, P. Dutta and K. Biradha, *CrystEngComm*, 2023.
5. G. Q. Huang, J. Chen, Y. L. Huang, K. Wu, D. Luo, J. K. Jin, J. Zheng, S. H. Xu and W. Lu, *Inorg. Chem.*, 2022, **61**, 8339-8348.
6. H. Lv, H. Chen, L. Fan and X. Zhang, *Inorg. Chem.*, 2022.
7. J. Deng, X. Wang, Z. Ni and F. Zhu, *Arab. J. Chem.*, 2020, **13**, 7482-7489.



Electronic Supplementary Information (ESI) for New Journal of Chemistry  
This journal is © The Royal Society of Chemistry 2023
